# Supplementary material for: Multi-Epitope-Based Vaccines for Colon Cancer Treatment and Prevention
Source: PubMed Central journal article supplement (PMC8437302; doi:10.3389/fimmu.2021.729809), 2021-08-30
Supplement: Presentation_1.pdf [file Presentation_1.pdf]

## SUPPLEMENTAL TABLES AND FIGURES

**Supplemental Table 1. Predicted MHC Class II binding epitopes**

| Protein | number    | # aa | sequence                  | % Homology of peptide with mouse |
|---------|-----------|------|---------------------------|----------------------------------|
| CDC25B  | p130-150  | 21   | qaiqaasriirneqfairrfq     | 78%                              |
|         | p405-427  | 23   | vdgkhqdlkyispetmvaltqk    | 100%                             |
| COX2    | p81-96    | 16   | fkqfwnvvnnpflrn           | 87%                              |
|         | p279-295  | 17   | glvpglmmyatiwlreh         | 100%                             |
|         | p538-553  | 16   | gevgfiintasiqslc          | 94%                              |
| FASCIN1 | p374-p398 | 25   | elflmklinrpiiivfrgehfigcr | 100%                             |
|         | p136-p154 | 19   | iamhpqvnivsvtrkryah       | 100%                             |
|         | p21-p40   | 20   | nkyltaeafgkvnasassl       | 100%                             |
|         | p190-p209 | 20   | tadhfrlrhdqrlvarpepa      | 95%                              |
| RCAS1   | p8-p27    | 20   | lfkfctclatvsvflkrlic      | 95%                              |
|         | p91-p110  | 20   | epdyfkdmtpirtktkivi       | 100%                             |
|         | p126-148  | 23   | gfssrlaatqdlpfihqsselgd   | 96%                              |
|         | p161-181  | 21   | eedaawqaeevlrqkladr       | 95%                              |

Orange highlighted epitopes were validated as responding to protein.

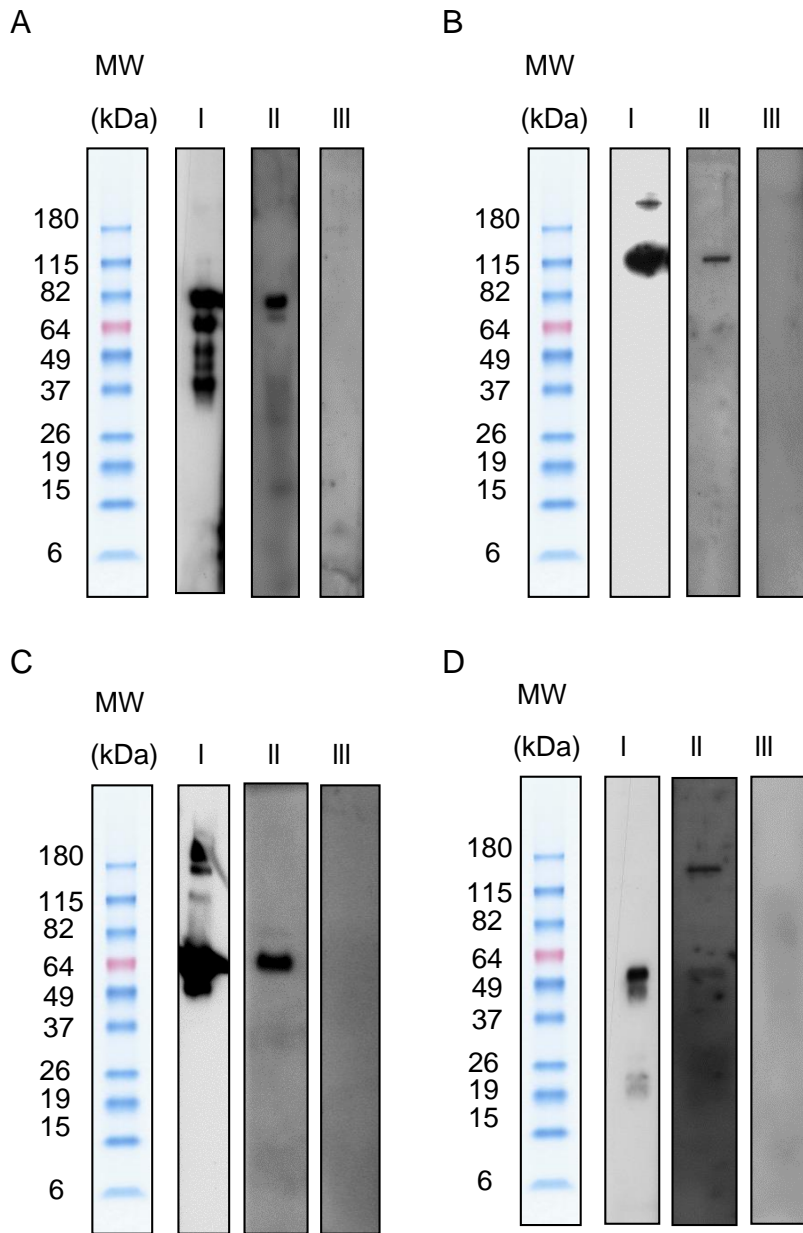

**Supplemental Figure 1.** Example Western blot validation of IgG antibody response to colorectal cancer antigens. (A) CDC25B; 62kD (B) COX2; 115kD (C) FASCIN1; 60 kD and (D) RCAS1; 50kD. (I) polyclonal antibody specific for the antigen, (II) a representative ELISA positive patient sample, (III) an ELISA negative subject sample. Molecular weight protein marker (far left).

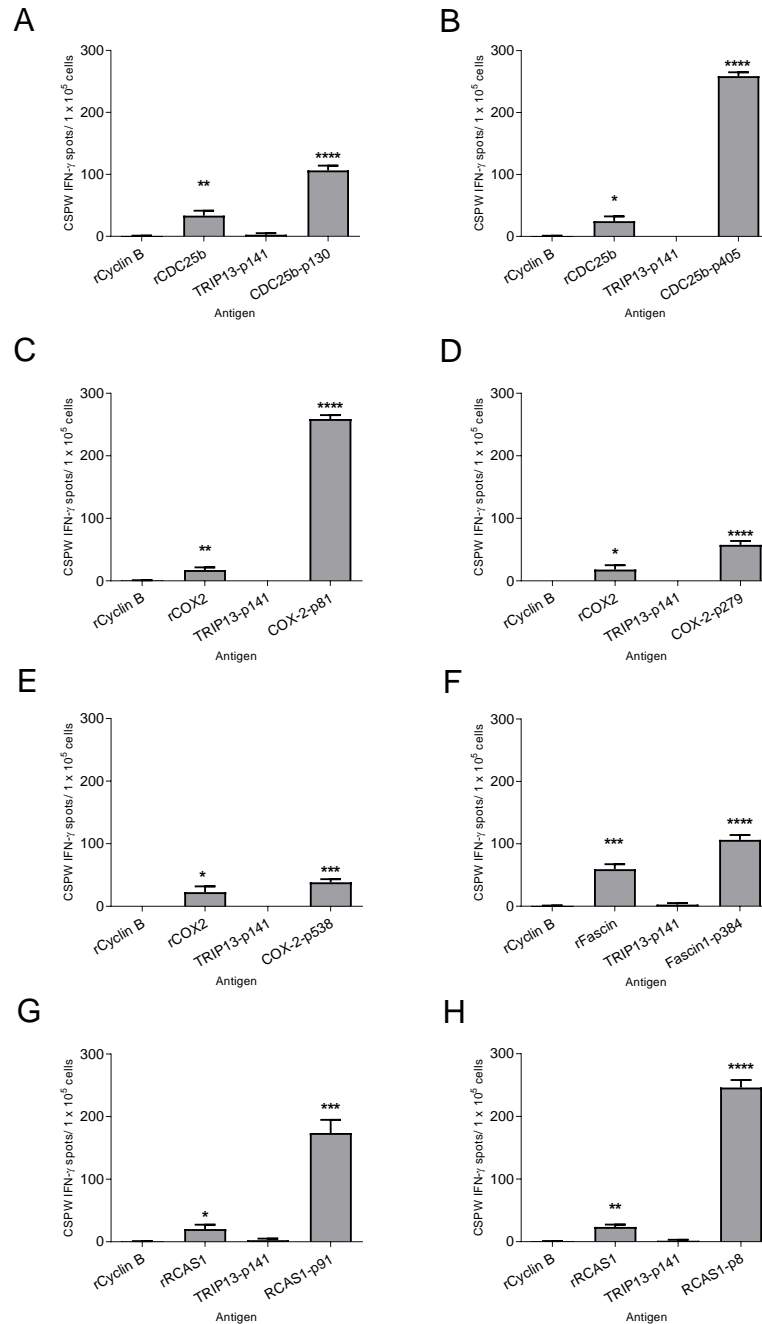

**Supplemental Figure 2. Epitope-specific Th1 response to naturally processed protein.** IFN- $\gamma$  ELISPOT cSPW (corrected spots per well) for (A) CDC25B-p130-specific T-cells, (B) CDC25B-p405-specific T-cells, (C) COX2-p81-specific T-cells, (D) COX2-p279-specific T-cells, (E) COX2-p538-specific T-cells, (F) Fascin-p384 specific T-cells, (G) RCAS1-p91-specific T-cells and (H) RCAS1-p8-specific T-cells stimulated with the expansion peptide or corresponding recombinant protein. TRIP13-p141 and recombinant Cyclin B are used as negative peptide and protein controls, respectively; \*\*\*\* $p < 0.0001$ , \*\*\* $p < 0.001$ , \*\* $p < 0.01$ , \* $p < 0.05$ .

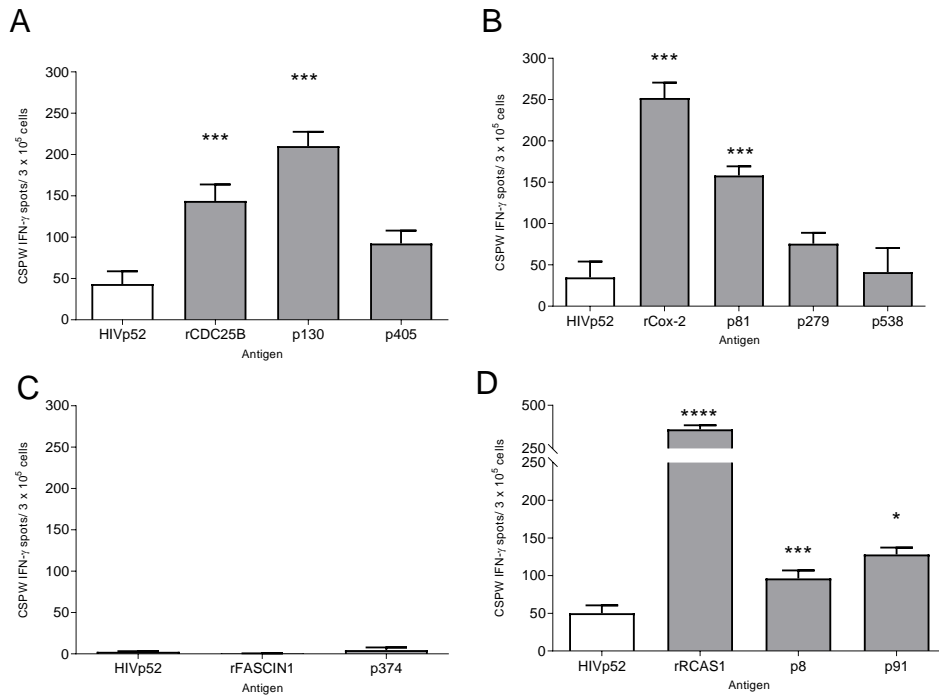

**Supplemental Figure 3. CDC25B, COX2, RCAS1, but not FASCIN1 peptides and protein elicit an Th1 response in mice.** Mean ( $\pm$ SEM) IFN- $\gamma$  corrected spots per well (CSPW) when splenocytes were stimulated with the indicated antigen after vaccination with peptides derived from (A) CDC25B, (B) COX2 (C) FASCIN1, and (D) RCAS1. \* $p < 0.05$ , \*\*\* $p < 0.001$ , \*\*\*\* $p < 0.0001$  as compared to the negative control HIVp52 peptide.

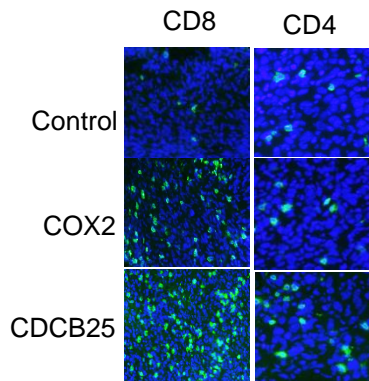

**Supplemental Figure 4.** Representative immunohistochemistry for CD8 and CD4 on tumors collected from the colon after immunization with the indicated vaccine. Positive T-cells are stained green and all cells are stained blue.
